# Supplementary material for: Identification and Validation of Pyroptosis-Related Gene Signature to Predict Prognosis and Reveal Immune Infiltration in Hepatocellular Carcinoma
Source: Front Cell Dev Biol. 2021 Nov 8;9:748039. doi: 10.3389/fcell.2021.748039 (PMC8606409; doi:10.3389/fcell.2021.748039)
Supplement: Supplementary file 2 [file Table4.XLSX]

## Sheet: Sheet1
Gene	Drug	cor	pvalue
DFNA5	Telatinib	0.612736	1.9557e-07
DFNA5	P-529	0.572694	1.74091e-06
DFNA5	By-Product of CUDC-305	-0.55611	3.96659e-06
DFNA5	XAV-939	0.528361	1.43089e-05
DFNA5	IDH-C227	0.522163	1.87696e-05
DFNA5	JNJ-38877605	0.489432	7.23128e-05
SCAF11	ON-123300	0.483733	9.02074e-05
DFNA5	AMG-900	-0.480884	0.000100605
DFNA5	Des-fluoro-TAK-960	-0.473666	0.000132067
DFNA5	Vinorelbine	-0.465936	0.00017558
DFNA5	Lenvatinib	0.453405	0.000274677
DFNA5	Tamoxifen	-0.445502	0.000361078
DFNA5	EMD-534085	-0.444527	0.000373305
DFNA5	Simvastatin	0.440192	0.000432326
DFNA5	PF-2771	-0.437735	0.000469423
DFNA5	Litronesib	-0.433133	0.000546793
DFNA5	ARQ-621	-0.426942	0.000669124
DFNA5	TAK-960	-0.425485	0.000701302
SCAF11	Palbociclib	0.424336	0.000727636
SCAF11	Chelerythrine	0.423934	0.000737064
DFNA5	GSK-921	-0.422968	0.000760169
DFNA5	ARRY-520 Isomer A	-0.422781	0.000764723
DFNA5	Docetaxel	-0.421492	0.000796753
DFNA5	DOLASTATIN 10	-0.421255	0.000802783
DFNA5	PKM2 (9)	0.419978	0.000835922
DFNA5	JNJ-3887618	0.41252	0.0010554
DFNA5	Momelotinib	0.411542	0.00108774
SCAF11	8-Chloro-adenosine	0.41124	0.0010979
DFNA5	Volasertib	-0.41048	0.00112386
DFNA5	Staurosporine	0.40737	0.00123592
DFNA5	VINORELBINE	-0.404113	0.00136397
DFNA5	spebrutinib	0.402383	0.00143672
DFNA5	BMS-387032	-0.402135	0.00144744
DFNA5	Eribulin mesilate	-0.401478	0.00147615
DFNA5	TAK Plk inhibitor	-0.401407	0.00147929
DFNA5	AM-5992	-0.401162	0.00149014
DFNA5	dimethylfasudil	0.398354	0.00161987
DFNA5	Paclitaxel	-0.397557	0.00165845
DFNA5	Bleomycin	0.396831	0.00169433
DFNA5	IDH1-Comp 301	0.396066	0.00173287
DFNA5	NMS-1286937	-0.395973	0.00173762
SCAF11	SAR-20347	0.394333	0.00182317
DFNA5	GSK-295	-0.391145	0.00200029
DFNA5	TP-0903	-0.387066	0.00224924
DFNA5	LDK-378	-0.384322	0.00243192
DFNA5	SHP-099	0.378538	0.00286093
DFNA5	PRN-1371	0.375356	0.00312455
SCAF11	3-Bromopyruvate (acid)	0.375031	0.00315263
DFNA5	Vinblastine	-0.375012	0.00315429
GPX4	Sabutoclax	0.372684	0.00336233
GPX4	Selumetinib	-0.37081	0.00353856
DFNA5	Zoledronate	0.370509	0.00356753
DFNA5	Tanespimycin	-0.368406	0.0037765
DFNA5	SGX-523	0.366416	0.00398411
SCAF11	Ribavirin	0.366283	0.00399833
DFNA5	TAK-901	-0.363706	0.00428304
SCAF11	LEE-011	0.36321	0.00433984
GPX4	Pimasertib	-0.361277	0.00456768
DFNA5	BAY-1161909	-0.360908	0.00461227
DFNA5	Barasertib	-0.359649	0.00476764
DFNA5	VX-944	-0.359399	0.00479893
DFNA5	BI-2536	-0.358391	0.00492728
DFNA5	Tegafur	-0.356309	0.00520214
DFNA5	BLU-667	0.355869	0.00526182
GPX4	TAK-733	-0.354549	0.00544479
DFNA5	Midostaurin	0.35398	0.00552529
DFNA5	SR16157	-0.353798	0.00555129
DFNA5	Crizotinib	-0.353416	0.00560631
DFNA5	Nilotinib	-0.353052	0.005659
GPX4	RO-4987655	-0.345119	0.00692218
GPX4	PD 184352	-0.342886	0.0073196
DFNA5	Fluorouracil	-0.342756	0.00734333
GPX4	ARRY-162	-0.341071	0.00765706
DFNA5	Cediranib	0.340905	0.00768862
DFNA5	Elesclomol	-0.338401	0.00817821
DFNA5	Raloxifene	-0.336091	0.00865387
DFNA5	Ribavirin	-0.335701	0.00873648
GPX4	SCH-772984	-0.335682	0.00874042
SCAF11	LY-2835219	0.334889	0.00891054
DFNA5	BAY-2402234	-0.333551	0.0092042
